# Supplementary material for: Controlling the folding of conjugated polymers at the single molecule level via hydrogen bonding
Source: Royal Society of Chemistry journal article supplement (doi:10.1039/c6py01871h), 2017-01-01
Supplement: c6py01871h1.pdf [file c6py01871h1.pdf]

## Electronic Supplementary Information

### Controlling the folding of conjugated polymers at the single molecule level via hydrogen bonding

*Beiyue Shao,<sup>†</sup> Xinju Zhu,<sup>‡</sup> Kyle N. Plunkett<sup>\*‡</sup> and David A. Vanden Bout<sup>\*†</sup>*

<sup>†</sup>Center for Nano- and Molecular Science and Technology, Department of Chemistry, The University of Texas at Austin, Austin, Texas 78712, United States

<sup>‡</sup>Department of Chemistry and Biochemistry and the Materials Technology Center, Southern Illinois University, Carbondale, IL 62901, United States

\*Email: [dvandenbout@cm.utexas.edu](mailto:dvandenbout@cm.utexas.edu)  
[kplunkett@chem.siu.edu](mailto:kplunkett@chem.siu.edu)

**S1.** Synthesis and GPC traces

**S2.** Absorption and Fluorescence Spectra in Other Solvent Systems

**S3.** Single Molecule Spectral Fittings

**S4.** NMR Spectra

**S5.** References

## S1. Synthesis

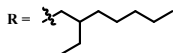

Unless otherwise noted, all reagents were used as received, and all reactions were carried out under an argon atmosphere. Column chromatography was performed on a chromatograph system with normal phase silica columns.  $^1\text{H}$  NMR and  $^{13}\text{C}$  NMR were recorded on a 400 MHz NMR station at room temperature. Synthetic procedures for compounds **5** and **9** can be found in our previous publication.<sup>1</sup>

**Diethyl 4,4'-(1,4-phenylenebis(oxy))dibutanoate (I).**<sup>2</sup> In a 250 mL round bottom flask was stirred KOH power (7.60 g, 136 mmol) in 150 mL of DMSO at 0 °C under argon. Hydroquinone (3.0 g, 27 mmol) was added followed by ethyl 4-bromobutyrate (14.8 g, 81.6 mmol) slowly. The mixture was stirred at 0 °C for 2 h and stirred at room temperature for 48 h. The mixture was cooled in an ice bath and poured into 1000 mL of cold water. The precipitation was collected under vacuum to give 7.5 g (83.3 %) of a white powder.  $^1\text{H}$  NMR (400 MHz,  $\text{CDCl}_3$ )  $\delta$  6.80 (s, 4H), 4.14 (q,  $J$  = 7.1 Hz, 4H), 3.95 (t,  $J$  = 6.1 Hz, 4H), 2.50 (t,  $J$  = 7.3 Hz, 4H), 2.12 – 2.04 (m, 4H), 1.25 (dd,  $J$  = 7.3, 6.9 Hz, 6H).  $^{13}\text{C}$  NMR (101 MHz,  $\text{CDCl}_3$ )  $\delta$  173.3, 153.0, 153.0, 115.4, 77.3, 77.0, 76.7, 67.4, 60.4, 30.8, 24.7, 14.2. Matches previous report.<sup>2</sup>

**4,4'-((2,5-bis(bromomethyl)-1,4-phenylene)bis(oxy))dibutanoic acid (II).** To a solution of **I** (2.0 g, 5.9 mmol) in 40 mL of AcOH at 60 °C was added paraformaldehyde (0.89 g, 30 mmol) and HBr (6.7 mL, 33% in AcOH). The mixture was stirred overnight at 60 °C and then cooled in an ice bath and poured into 200 mL cold water. The precipitation was filtered and then washed with  $\text{CH}_2\text{Cl}_2$  to give 1.9 g (70 %) of a white powder. The product was further purified by recrystallization in acetone.  $^1\text{H}$  NMR (400 MHz,  $\text{DMSO}-d_6$ )  $\delta$  12.12 (s, 2H), 7.11 (s, 2H), 4.62 (s, 4H), 4.01 (t,  $J$  = 6.2 Hz, 4H), 2.45 (t,  $J$  = 7.3 Hz, 4H), 2.00 – 1.93 (m, 4H).  $^{13}\text{C}$  NMR (101 MHz,  $\text{DMSO}-d_6$ )  $\delta$  174.6, 150.6, 127.7, 115.3, 67.9, 40.6, 40.4, 40.2, 40.0, 39.8, 39.6, 39.4, 30.6, 30.2, 24.8. LRMS (ESI) 467.0 HRMS:  $m/z$  for  $\text{C}_{16}\text{H}_{19}\text{Br}_2\text{O}_6$  calc: 464.9548, found 464.9547.

**4,4'-((2,5-bis((diethoxyphosphoryl)methyl)-1,4-phenylene)bis(oxy))dibutanoic acid (4).** In a 20 mL vial was added **II** (2.0 g, 4.3 mmol) and triethyl phosphite (1.77 g, 10.7 mmol). The mixture was heated at 140 °C for 2 h and then cooled to room temperature. The resulting solid was filtered and was washed with  $\text{CH}_2\text{Cl}_2$  to give 1.1 g (45 %) of a white solid. The product was further purified by recrystallization in acetone.  $^1\text{H}$  NMR (400 MHz,  $\text{DMSO}-d_6$ )  $\delta$  12.11 (s, 2H), 6.87 (d,  $J$  = 1.4 Hz, 2H), 3.97 – 3.88 (m, 12H), 3.14 (d,  $J$  = 20.2 Hz, 4H), 2.42 (t,  $J$  = 7.3 Hz, 4H), 1.98 – 1.90 (m, 4H), 1.16 (t,  $J$  = 7.0 Hz, 12H).  $^{13}\text{C}$  NMR (101 MHz,  $\text{DMSO}-d_6$ )  $\delta$  174.6, 150.2, 120.0, 115.4, 67.9, 61.7, 40.6, 40.4, 40.2, 40.0, 39.8, 39.5, 39.3, 30.6, 24.9, 16.7, 16.6. LRMS (ESI) 581.2 HRMS:  $m/z$  for  $\text{C}_{24}\text{H}_{39}\text{O}_{12}\text{P}_2$  calc: 581.1917, found 581.1920.

**Iodo-Diacid-PPV-Trimer (6).** In a 250 mL round bottom flask was stirred **4** (1.20 g, 2.06 mmol) and **5**<sup>1</sup> (3.02 g, 6.18 mmol) in DMF (150 mL) under argon for 10 min at room temperature.  $t\text{-BuOK}$  (1.16 g, 10.3 mmol) was slowly added and the reaction was vigorously stirred for 4 h at 50 °C.  $\text{CH}_2\text{Cl}_2$  (300 mL) was added and the mixture was extracted with 1 M HCl (500 mL), water (2 X 500 mL) and brine (100 mL). The organic layer was dried over  $\text{MgSO}_4$  and concentrated. The residue and a catalytic amount of iodine (2.5 mg, 0.01 mmol) was dissolved in toluene (50 mL) and refluxed overnight. The mixture was directly concentrated and purified by silica gel chromatography (0  $\rightarrow$  25% EtOAc in hexane,  $R_f$  = 0.4) to give 908 mg (35.3 %) of a yellow solid.  $^1\text{H}$  NMR (400 MHz,  $\text{CD}_2\text{Cl}_2$ )  $\delta$  7.44, 7.40 (ABq,  $J$  = 16.6 Hz, 4H), 7.29 (s, 2H), 7.12 (s, 2H), 7.09 (s, 2H), 4.08 (t,  $J$  = 6.0 Hz, 4H), 3.91 (d,  $J$  = 5.4 Hz, 4H), 3.87 – 3.80 (m, 4H), 2.59 (t,  $J$  = 7.1 Hz, 4H), 2.19 – 2.11 (m, 4H), 1.79 – 1.69 (m, 4H), 1.60 – 1.25 (m, 32H), 0.97 – 0.83 (m, 24H).  $^{13}\text{C}$  NMR (101 MHz,  $\text{CD}_2\text{Cl}_2$ )  $\delta$  178.1, 152.3, 151.3, 150.7, 127.8, 127.2, 123.5, 123.1, 110.0, 109.1, 85.3, 72.1, 71.9, 67.8, 53.9, 53.7, 53.4, 53.1, 52.9, 39.6, 30.7, 30.5, 30.4, 29.0, 24.5, 24.1, 24.0, 23.1, 13.9, 13.8, 11.0. LRMS (ESI) 1249.5 HRMS:  $m/z$  for  $\text{C}_{62}\text{H}_{91}\text{I}_2\text{O}_{10}$  calc: 1249.4702, found 1249.4692.

**Iodo-Di-*n*-Butyl-PPV-Trimer (7).** To a solution of **6** (200 mg, 0.160 mmol) in 10 mL  $\text{CHCl}_3$ , pyridine

(0.25 mL, 3.2 mmol) and t-BuOH (474 mg, 6.40 mmol) was added POCl<sub>3</sub> (0.08 mL, 0.9 mmol) dropwise at 0 °C. The mixture was stirred for 5 h at room temperature. CH<sub>2</sub>Cl<sub>2</sub> (100 mL) was added and the mixture was extracted with water (2 X 50 mL) and brine (50 mL). The organic layer was dried over MgSO<sub>4</sub> and concentrated. The residue was purified by silica gel chromatography (0 → 30% CH<sub>2</sub>Cl<sub>2</sub> in hexane, R<sub>f</sub> = 0.4) to give 124 mg (56.9 %) of a yellow oil. <sup>1</sup>H NMR (400 MHz, CD<sub>2</sub>Cl<sub>2</sub>) δ 7.49, 7.42 (ABq, *J* = 16.6 Hz, 4H), 7.31 (s, 2H), 7.15 (s, 2H), 7.12 (s, 2H), 4.07 (t, *J* = 6.3 Hz, 4H), 3.95 (d, *J* = 5.4 Hz, 4H), 3.90 – 3.84 (m, 4H), 2.45 (t, *J* = 7.2 Hz, 4H), 2.12 (t, *J* = 6.7 Hz, 4H), 1.83 – 1.73 (m, 4H), 1.63 – 1.28 (m, 32H), 1.40 (s, 18H), 1.01 – 0.86 (m, 24H). <sup>13</sup>C NMR (101 MHz, CD<sub>2</sub>Cl<sub>2</sub>) δ 172.0, 152.3, 151.4, 150.9, 128.0, 127.3, 123.5, 123.5, 123.1, 110.3, 109.3, 85.2, 80.0, 72.1, 71.9, 68.3, 53.7, 53.4, 53.1, 39.6, 32.0, 30.7, 30.6, 29.1, 27.8, 25.0, 24.1, 24.0, 23.1, 13.9, 13.9, 11.0. LRMS (ESI) 1363.6 HRMS: *m/z* for C<sub>70</sub>H<sub>108</sub>I<sub>2</sub>O<sub>10</sub> calc. 1362.6032, found 1362.5995.

**Iodo-Diurea-PPV-Trimer (8).** To a solution of **6** (170 mg, 0.14 mmol) in anhydrous MeCN/CHCl<sub>3</sub> (10 mL/10 mL) was added Et<sub>3</sub>N (0.045 mL, 0.33 mmol) and diphenylphosphoryl azide (0.070 mL, 0.33 mmol). The mixture was stirred for 1 h at room temperature, and then heated for another 2 h at 50 °C. The reaction mixture was cooled to room temperature, and propylamine (0.1 mL, 1.36 mmol) was added. The mixture was stirred at 30 °C overnight and then directly concentrated and purified by silica gel chromatography (0 → 35% EtOAc in hexane, R<sub>f</sub> = 0.4) to give 80 mg (43.2 %) of a yellow solid. <sup>1</sup>H NMR (400 MHz, CDCl<sub>3</sub>) δ 7.44, 7.38 (ABq, *J* = 16.4 Hz, 4H), 7.30 (s, 4H), 7.09 (s, 4H), 7.01 (s, 4H), 4.65 (t, *J* = 5.6 Hz, 4H), 4.14 (t, *J* = 5.6 Hz, 4H), 4.07 (t, *J* = 5.7 Hz, 2H), 3.91 (d, *J* = 5.4 Hz, 4H), 3.88 – 3.81 (m, 4H), 3.43 (dd, *J* = 12.0, 5.9 Hz, 4H), 2.92 (dd, *J* = 13.7, 6.4 Hz, 4H), 2.10 – 2.01 (m, 4H), 1.81–1.72 (m, 4H), 1.60 – 1.24 (m, 36H), 0.99 – 0.85 (m, 24H), 0.78 (t, *J* = 7.4 Hz, 6H). <sup>13</sup>C NMR (101 MHz, CD<sub>2</sub>Cl<sub>2</sub>) δ 157.9, 152.4, 151.3, 150.7, 127.6, 127.2, 123.9, 123.6, 110.4, 109.3, 85.5, 72.1, 72.0, 67.3, 53.9, 53.7, 53.4, 53.1, 52.9, 42.1, 39.6, 39.5, 38.0, 30.6, 30.5, 29.9, 29.1, 29.0, 24.1, 23.9, 23.4, 23.0, 13.9, 13.8, 11.2, 11.01, 10.97. LRMS (ESI) 1363.6 HRMS: *m/z* for C<sub>68</sub>H<sub>109</sub>I<sub>2</sub>N<sub>4</sub>O<sub>8</sub> calc. 1363.6335, found 1363.6282.

**Di-*t*-butyl trimer-co-alkoxy-polymer (1).** In a glovebox were combined **7** (92.1 mg, 0.0676 mmol), **9<sup>1</sup>** (27.5 mg, 0.0696 mmol), Pd(PPh<sub>3</sub>)<sub>4</sub> (3.9 mg, 0.0034 mmol), CuI (0.65 mg, 0.0034 mmol), toluene (10 mL) and diisopropylamine (2 mL) in a sealed tube. The reaction vessel was sealed and heated at 85 °C for 3 days. The reaction mixture was filtered and the filtrate was concentrated. The residue was repetitively precipitated from THF by dropwise addition to methanol, hexane, and then methanol to give a brown tacky product (54 mg, 53.5 %). <sup>1</sup>H NMR (400 MHz, CD<sub>2</sub>Cl<sub>2</sub>) δ 7.52 (s, 4H), 7.47 (d, *J* = 8.6 Hz, 4H), 7.21 (d, *J* = 14.4 Hz, 4H), 7.03 (s, 2H), 6.93 (d, *J* = 8.7 Hz, 4H), 4.18–4.14 (m, 4H), 4.10 (t, *J* = 6.1 Hz, 4H), 4.05–4.00 (m, 4H), 3.97 – 3.90 (m, 4H), 3.87–3.83 (m, 4H), 3.73–3.64 (m, 8H), 2.48 (t, *J* = 7.2 Hz, 4H), 2.19 – 2.11 (m, 4H), 1.87–1.78 (m, 4H), 1.67–1.30 (m, 32H), 1.42 (s, 18H), 1.03–0.88 (m, 24H). Mn = 40,053, PDI = 1.3.

**Di-carboxylic acid trimer-co-alkoxy-polymer (2).** In a glovebox were combined **6** (54.5 mg, 0.0436 mmol), **9<sup>1</sup>** (17.5 mg, 0.0449 mmol), Pd(PPh<sub>3</sub>)<sub>4</sub> (2.5 mg, 0.00218 mmol), CuI (0.42 mg, 0.00218 mmol), THF (5 mL), water (1 mL) and diisopropylamine (1.5 mL) in a sealed tube. The reaction vessel was sealed and heated at 65 °C for 3 days. The reaction mixture was filtered and the filtrate was concentrated. The residue was repetitively precipitated from THF by dropwise addition to methanol, hexane, and then methanol to give a brown tacky product (32.1 mg, 48.6 %). <sup>1</sup>H NMR (400 MHz, CD<sub>2</sub>Cl<sub>2</sub>) δ 7.57–7.39 (m, 8H), 7.26–7.11 (s, 4H), 7.04 – 6.98 (m, 2H), 6.97–6.85 (m, 4H), 4.19–4.06 (m, 8H), 4.03–3.78 (m, 12H), 3.73–3.60 (m, 8H), 2.71 – 2.42 (m, 4H), 2.26–2.04 (m, 4H), 1.84 – 1.16 (m, 32H), 1.02 – 0.78 (m, 24H). Mn = 13,140, PDI = 1.6.

**Di-urea-trimer-co-alkoxy-polymer (3).** In a glovebox were combined **8** (19.47 mg, 0.0143 mmol), **9<sup>1</sup>** (27.4 mg, 0.0694 mmol), Pd(PPh<sub>3</sub>)<sub>4</sub> (0.83 mg, 0.0007 mmol), CuI (0.13 mg, 0.0007 mmol), THF (5 mL),

water (1 mL) and diisopropylamine (1.5 mL) in a sealed tube. The reaction vessel was sealed and heated at 65 °C for 3 days. The reaction mixture was filtered and the filtrate was concentrated. The residue was repetitively precipitated from THF by dropwise addition to methanol, hexane, and then methanol to give a brown tacky product (13 mg, 52.0 %). <sup>1</sup>H NMR (400 MHz, CD<sub>2</sub>Cl<sub>2</sub>) δ 7.51 (s, 4H), 7.49 – 7.42 (m, 4H), 7.22 – 7.11 (m, 4H), 7.06 – 6.99 (m, 2H), 6.95 – 6.86 (m, 4H), 4.19-4.09 (m, 8H), 4.01 – 3.80 (m, 12H), 3.72-3.62 (m, 8H), 3.44 – 3.35 (m, 4H), 2.99 – 2.91 (m, 4H), 2.08 – 2.00 (m, 4H), 1.84 – 1.75 (m, 4H), 1.39-1.24 (m, 36H), 1.02-0.77 (m, 30H). Mn = 12,690, PDI = 1.5.

## GPC trace of fractionated Polymer 1

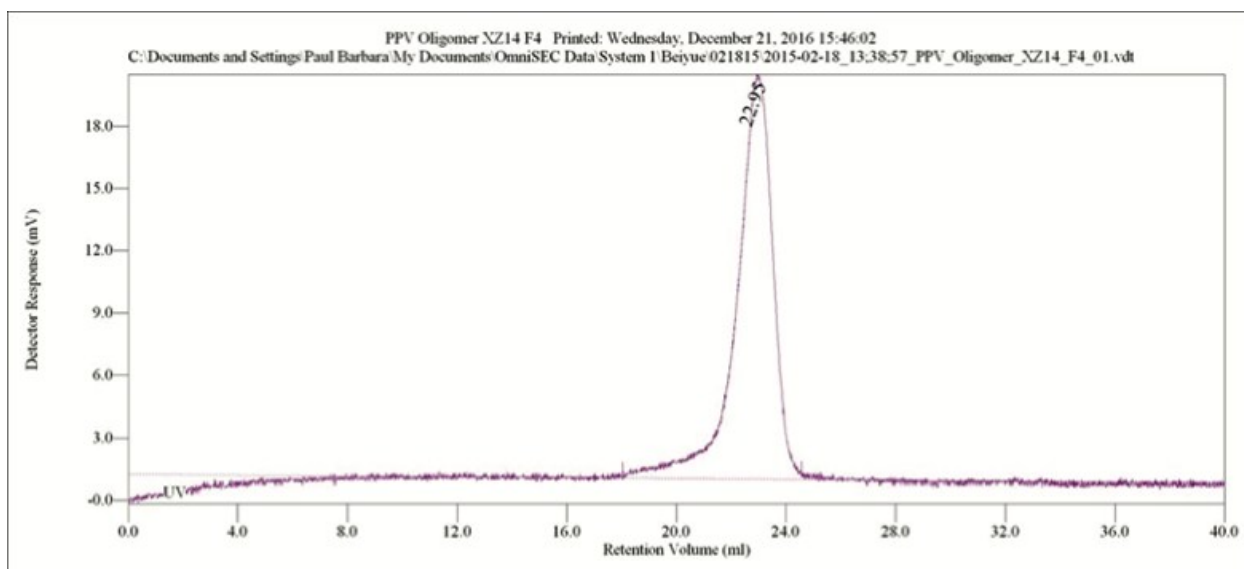

### Conventional Calibration - Homopolymers : Results

|                        |        |
|------------------------|--------|
| Peak RV - (ml)         | 22.950 |
| Mn - (Daltons)         | 12,976 |
| Mw - (Daltons)         | 19,048 |
| Mz - (Daltons)         | 54,447 |
| Mp - (Daltons)         | 11,978 |
| Mw / Mn                | 1.468  |
| Percent Above Mw: 0    | 0.000  |
| Percent Below Mw: 0    | 0.000  |
| Mw 10.0% Low           | 7,654  |
| Mw 10.0% High          | 72,031 |
| RI Area - (mVml)       | 0.00   |
| UV@450nm Area - (mVml) | 29.92  |

| Annotation               |                                              |
|--------------------------|----------------------------------------------|
| Method File              | Method 100311 450nm-0000.vcm                 |
| Limits File              | XZ14 F4 01-Method 100311 450nm-0000-0003.lim |
| Date Acquired            | Feb 18, 2015 - 13:38:57                      |
| Solvent                  | THF                                          |
| Acquisition Operator     | autologin : UT Austin NST                    |
| Calculation Operator     | autologin : UT Austin NST                    |
| Column Set               | I-MBHMW                                      |
| System                   | System 1                                     |
| Flow Rate - (ml/min)     | 1.000                                        |
| Inj Volume - (ul)        | 100.0                                        |
| Volume Increment - (ml)  | 0.00333                                      |
| Detector Temp. - (deg C) | 35.0                                         |
| Column Temp. - (deg C)   | 40.0                                         |
| OmniSEC Build Number     | 354                                          |

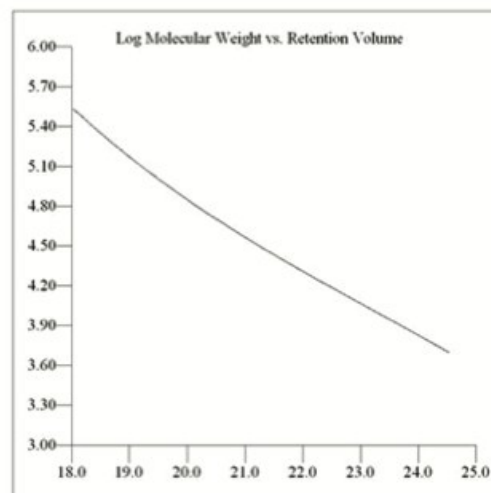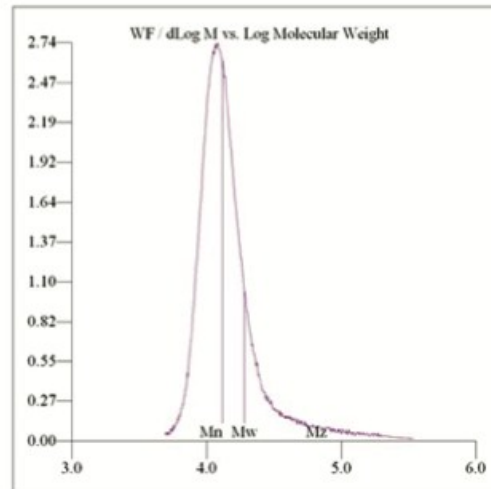

## GPC trace of fractionated Polymer 2

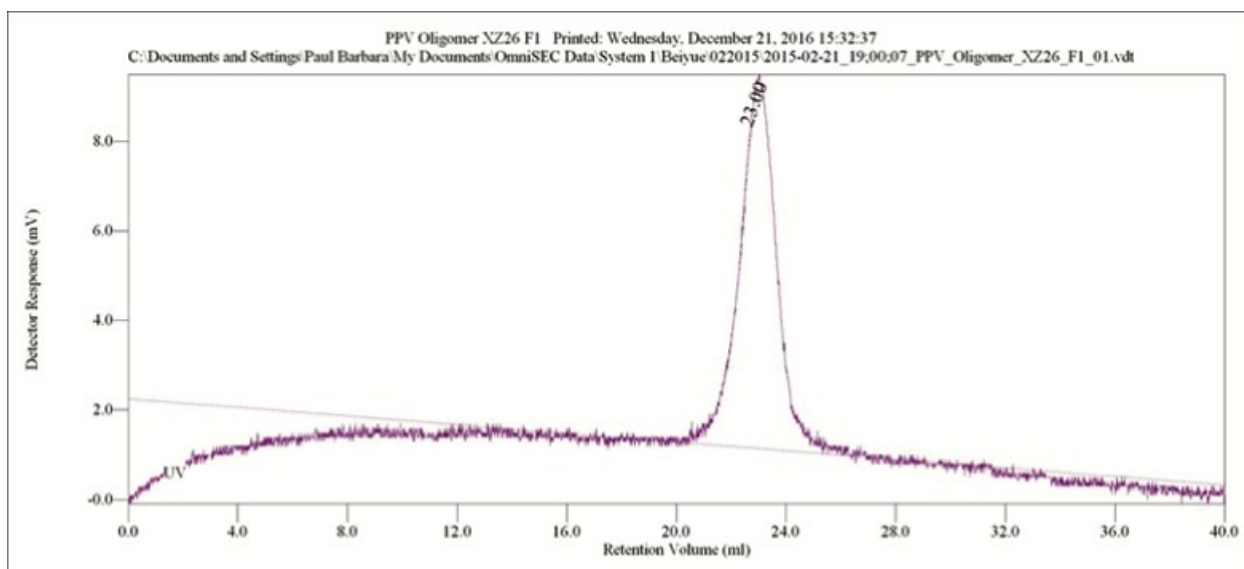

### Conventional Calibration - Homopolymers : Results

|                        |        |
|------------------------|--------|
| Peak RV - (ml)         | 22.997 |
| Mn - (Daltons)         | 11,263 |
| Mw - (Daltons)         | 13,157 |
| Mz - (Daltons)         | 15,654 |
| Mp - (Daltons)         | 11,661 |
| Mw / Mn                | 1.168  |
| Percent Above Mw: 0    | 0.000  |
| Percent Below Mw: 0    | 0.006  |
| Mw 10.0% Low           | 6,251  |
| Mw 10.0% High          | 25,960 |
| RI Area - (mVml)       | 0.00   |
| UV@450nm Area - (mVml) | 12.89  |

| Annotation               |                                              |
|--------------------------|----------------------------------------------|
| Method File              | Method 100311 450nm-0000.vcm                 |
| Limits File              | XZ26 F1 01-Method 100311 450nm-0000-0000.lim |
| Date Acquired            | Feb 21, 2015 - 19:00:07                      |
| Solvent                  | THF                                          |
| Acquisition Operator     | autologin : UT Austin NST                    |
| Calculation Operator     | autologin : UT Austin NST                    |
| Column Set               | EMBMW                                        |
| System                   | System 1                                     |
| Flow Rate - (ml/min)     | 1.000                                        |
| Inj Volume - (ul)        | 100.0                                        |
| Volume Increment - (ml)  | 0.00333                                      |
| Detector Temp. - (deg C) | 35.0                                         |
| Column Temp. - (deg C)   | 40.0                                         |
| OmniSEC Build Number     | 354                                          |

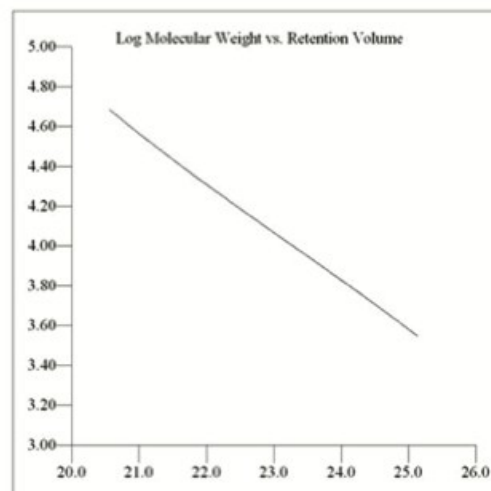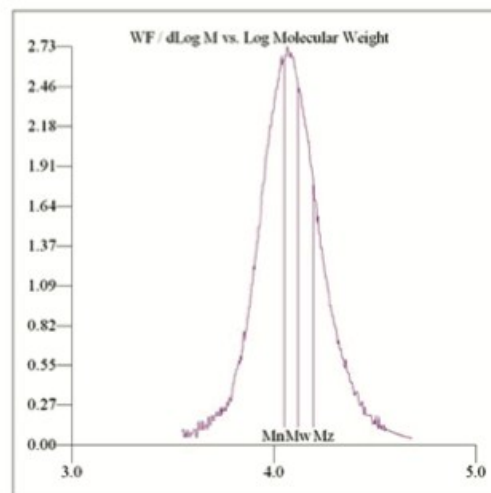

### GPC trace of fractionated Polymer 3

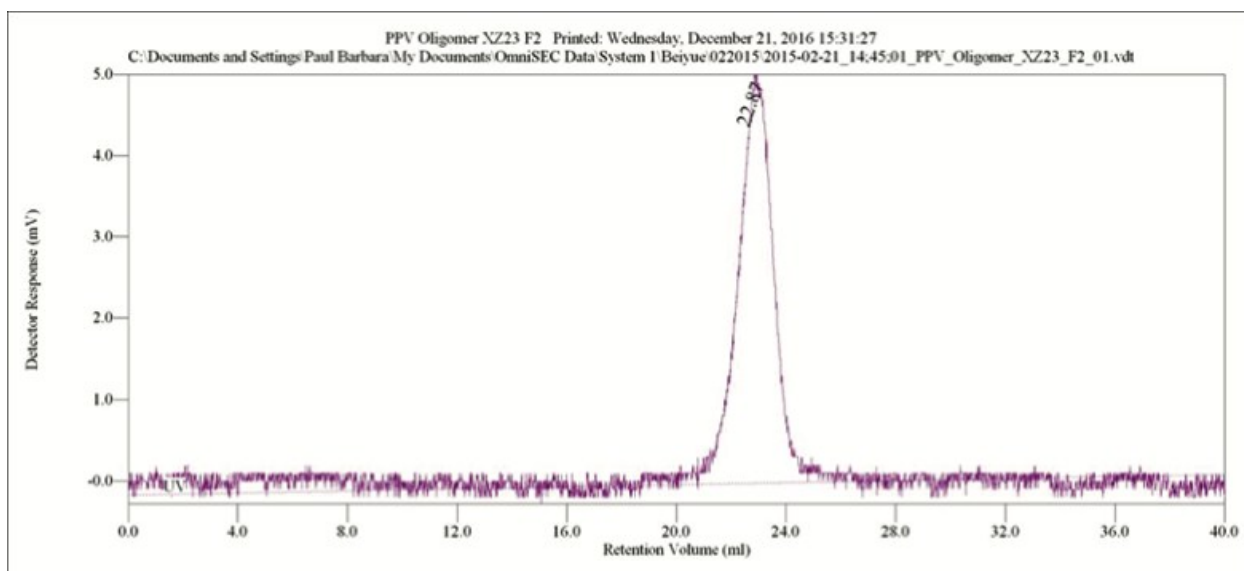

#### Conventional Calibration - Homopolymers : Results

|                        |        |
|------------------------|--------|
| Peak RV - (ml)         | 22.867 |
| Mn - (Daltons)         | 11,851 |
| Mw - (Daltons)         | 13,483 |
| Mz - (Daltons)         | 15,469 |
| Mp - (Daltons)         | 12,544 |
| Mw / Mn                | 1.138  |
| Percent Above Mw: 0    | 0.000  |
| Percent Below Mw: 0    | 0.000  |
| Mw 10.0% Low           | 6,888  |
| Mw 10.0% High          | 25,570 |
| RI Area - (mVml)       | 0.00   |
| UV@450nm Area - (mVml) | 7.42   |

|                          |                                              |
|--------------------------|----------------------------------------------|
| Annotation               |                                              |
| Method File              | Method 100311 450nm-0000.vcm                 |
| Limits File              | XZ23 F2 01-Method 100311 450nm-0000-0000.lim |
| Date Acquired            | Feb 21, 2015 - 14:45:01                      |
| Solvent                  | THF                                          |
| Acquisition Operator     | autologin : UT Austin NST                    |
| Calculation Operator     | autologin : UT Austin NST                    |
| Column Set               | I-MBHMW                                      |
| System                   | System 1                                     |
| Flow Rate - (ml/min)     | 1.000                                        |
| Inj Volume - (ul)        | 100.0                                        |
| Volume Increment - (ml)  | 0.00333                                      |
| Detector Temp. - (deg C) | 35.0                                         |
| Column Temp. - (deg C)   | 40.0                                         |
| OmniSEC Build Number     | 354                                          |

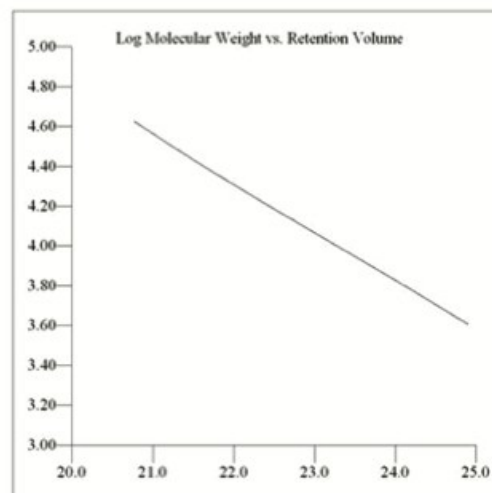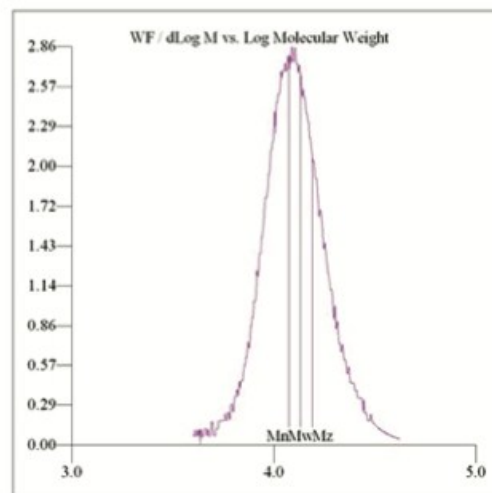

## S2. Absorption and Fluorescence Spectra in Other Solvent Systems

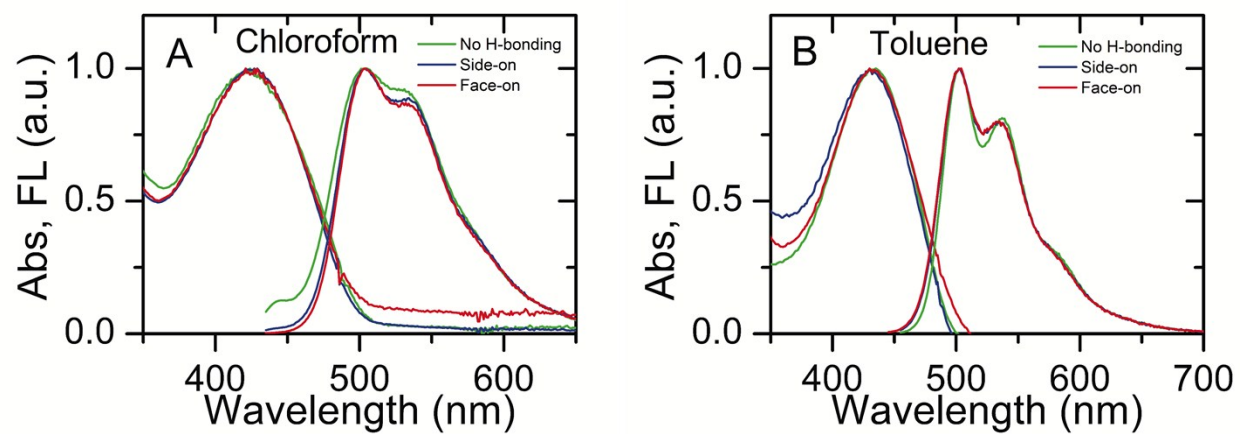

Figure 1S. Absorption and fluorescence emission spectra of all three polymers in A) chloroform and B) toluene.

### S3. Single Molecule Spectral Fittings

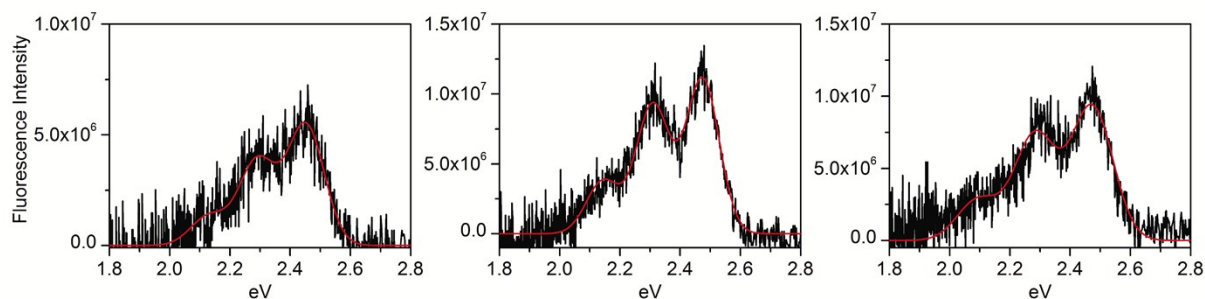

Figure 2S. Sample single molecule spectra (black) with fitting results (red) of polymer 1.

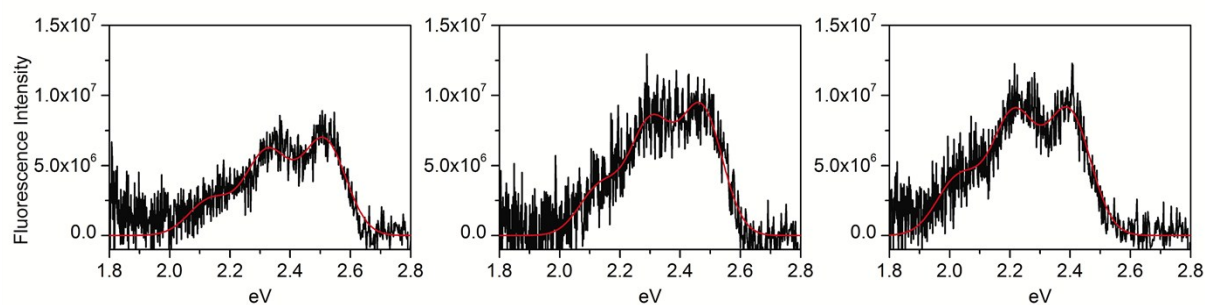

Fi

Figure 3S. Sample single molecule spectra (black) with fitting results (red) of polymer 2.

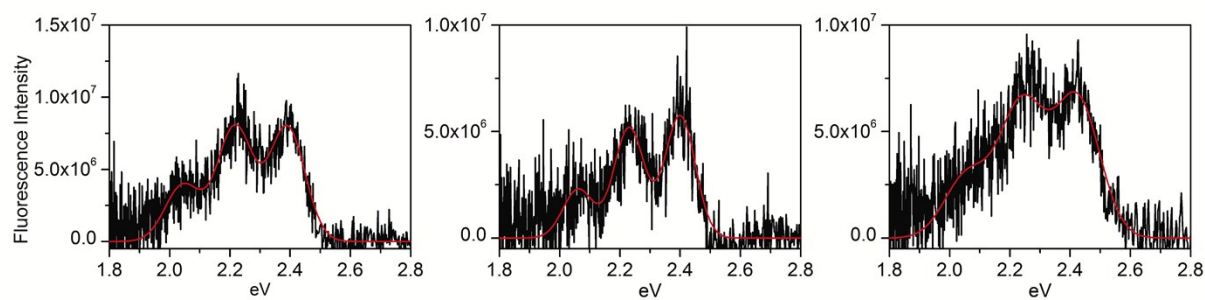

Figure 4S. Sample single molecule spectra (black) with fitting results (red) of polymer 3.

| <i>Polymer</i>                | <i>S Factor</i> | <i>E<sub>0-0</sub> (eV)</i> |
|-------------------------------|-----------------|-----------------------------|
| <b><i>Single Molecule</i></b> |                 |                             |
| <b>1 (no H-Bonding)</b>       | 1.04±0.10       | 2.47±0.03                   |
| <b>2 (Side-on)</b>            | 1.06±0.07       | 2.47±0.03                   |
| <b>3 (Face-on)</b>            | 1.11±0.13       | 2.41±0.02                   |
| <b><i>Solution</i></b>        |                 |                             |
| <b>1 (no H-Bonding)</b>       | 1.096           | 2.482                       |
| <b>2 (Side-on)</b>            | 1.097           | 2.483                       |
| <b>3 (Face-on)</b>            | 1.102           | 2.474                       |

Table 1S. Franck-Condon fitting results of single molecule and solution fluorescence spectra of all three polymers.

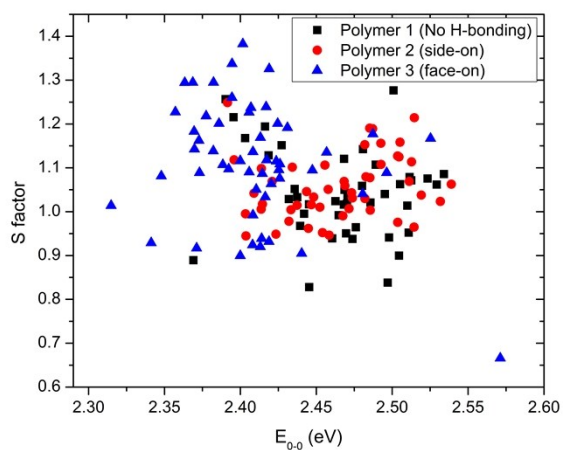

Figure 5S. Scatter plot of S factor vs  $E_{0-0}$  for all the polymers.

### 3. NMR Spectra

### Compound I

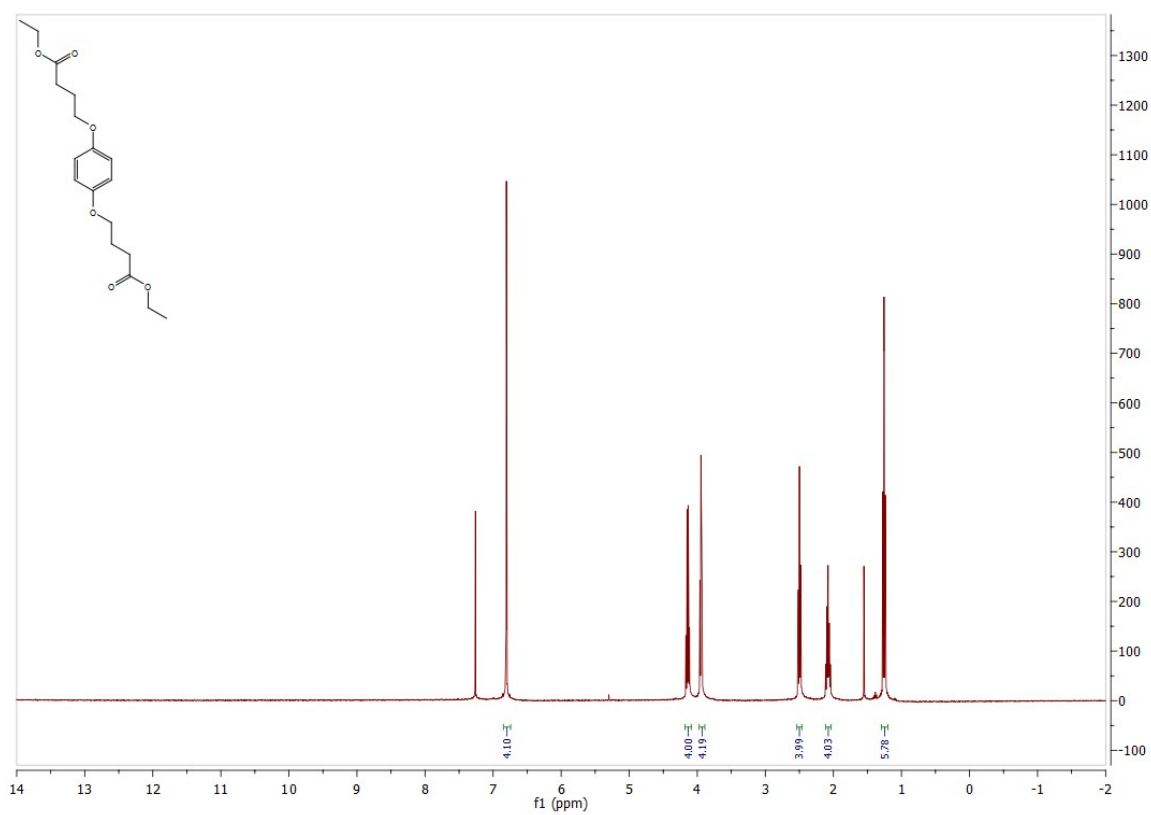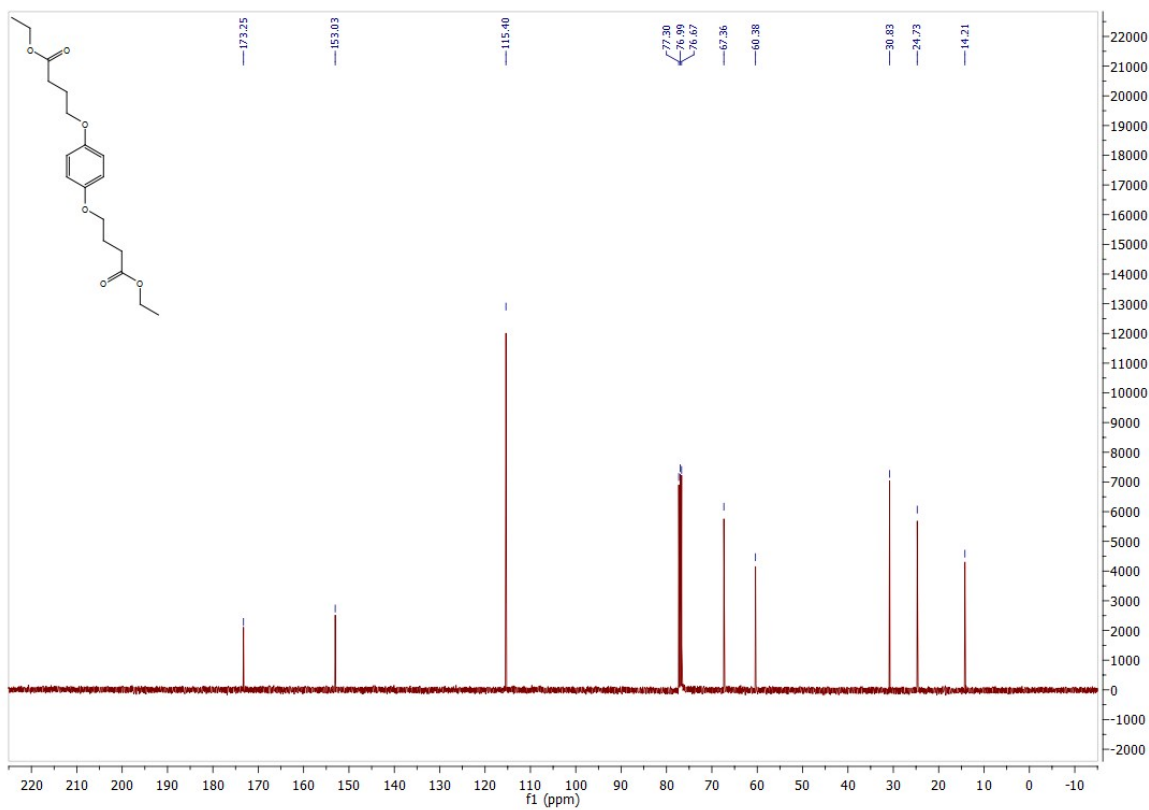

## Compound II

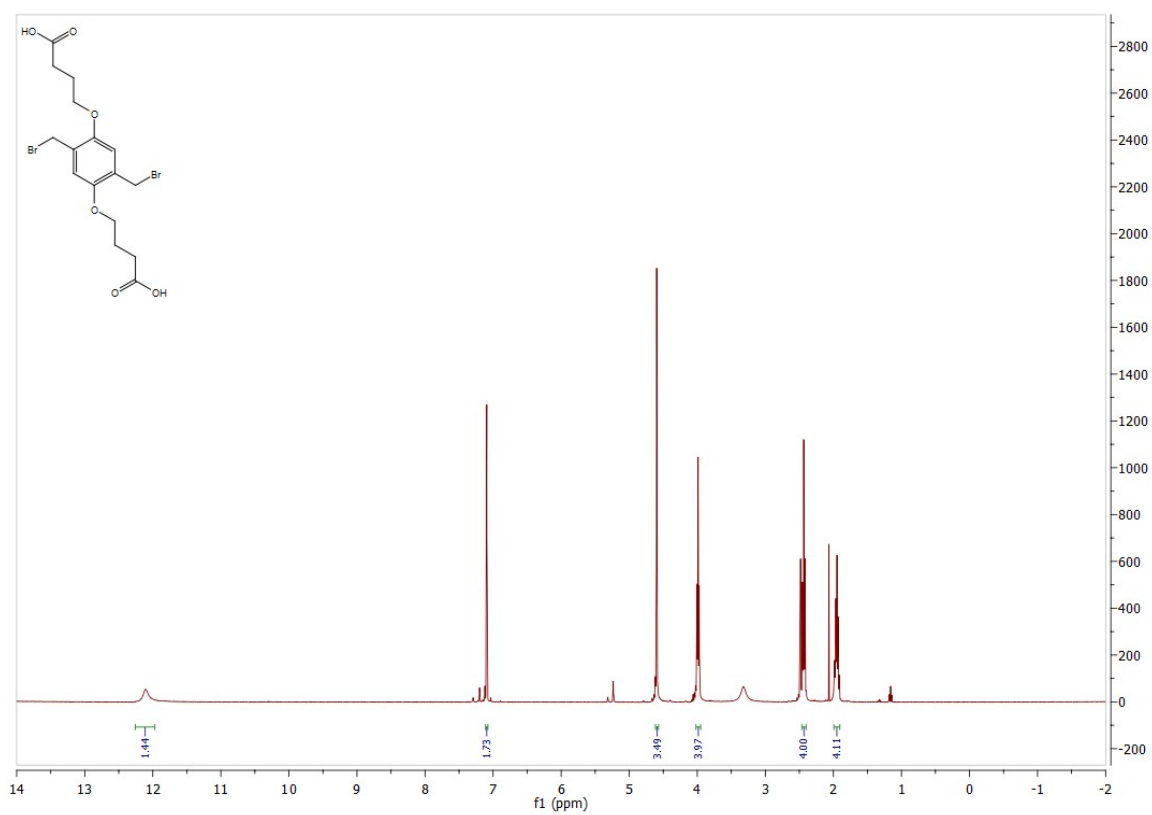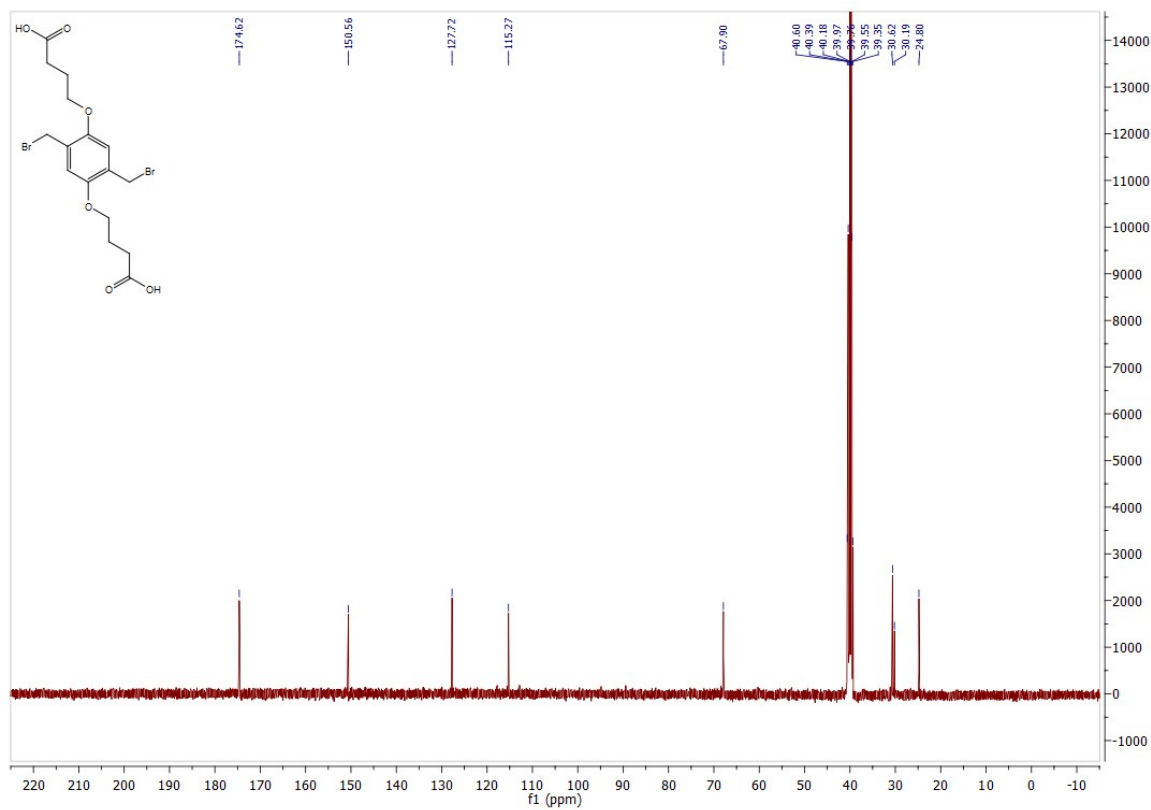

# Compound 4

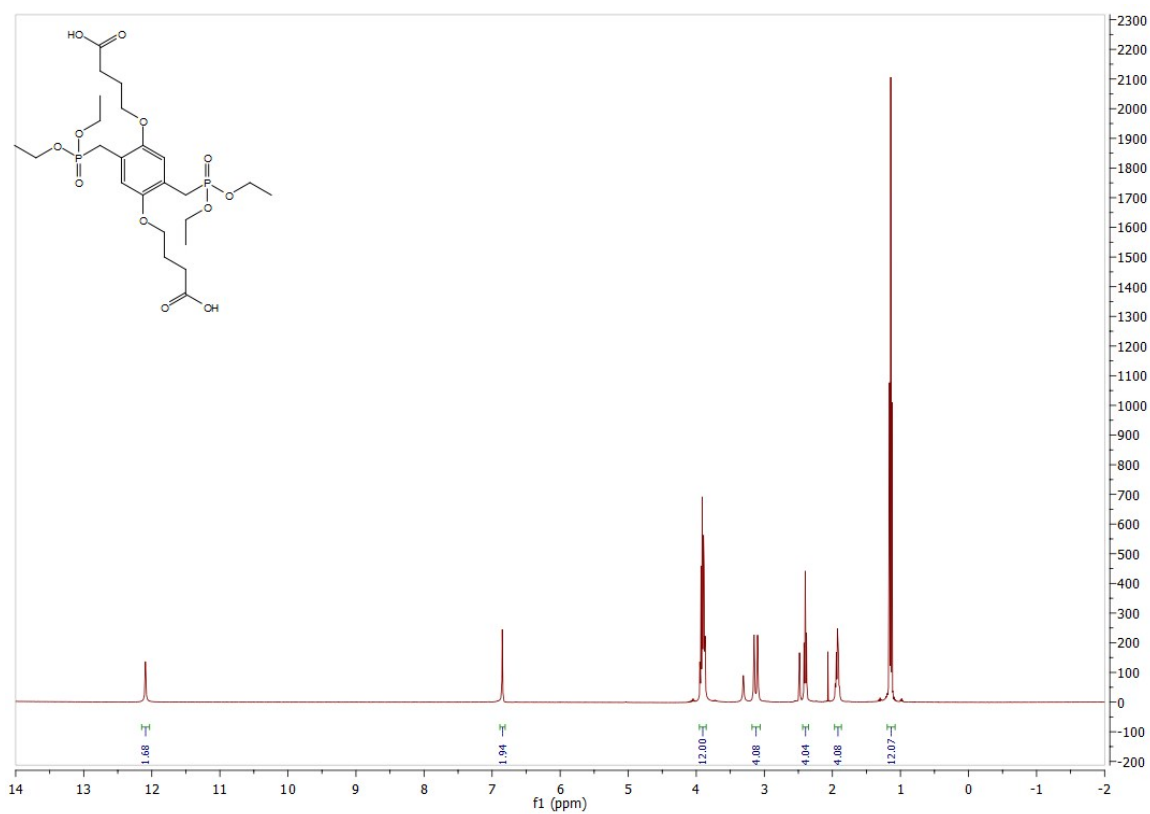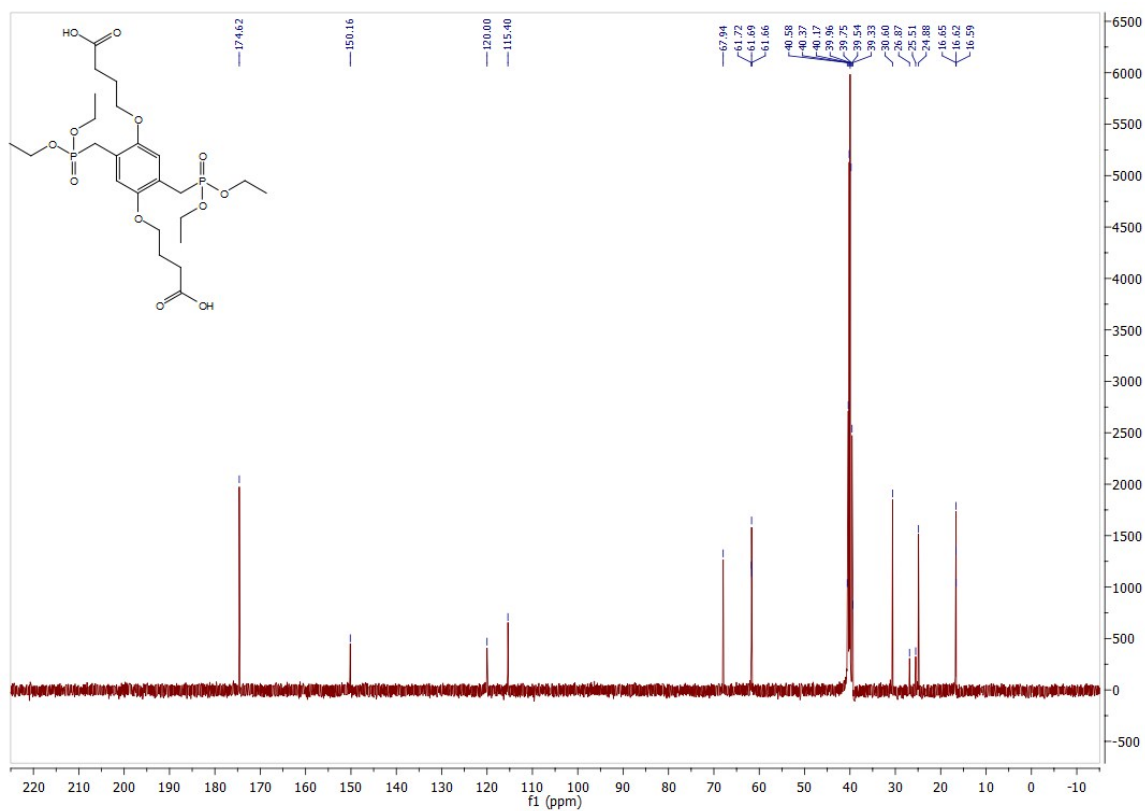

# Compound 6

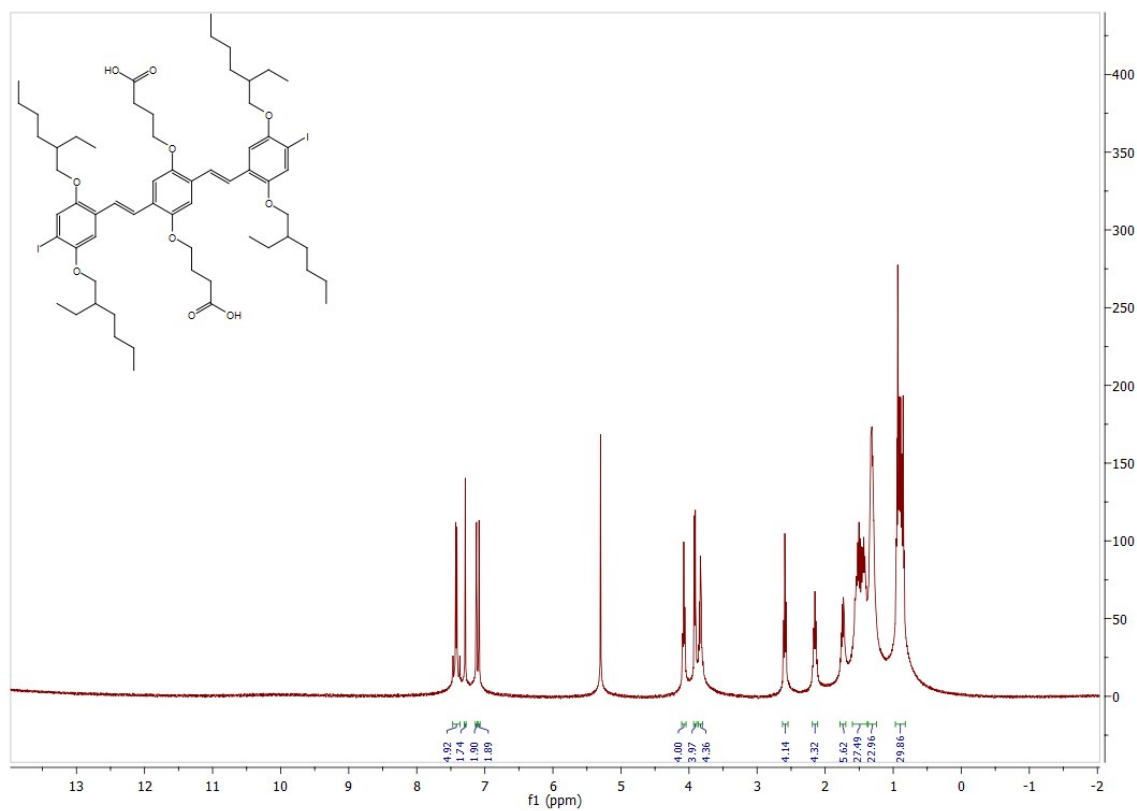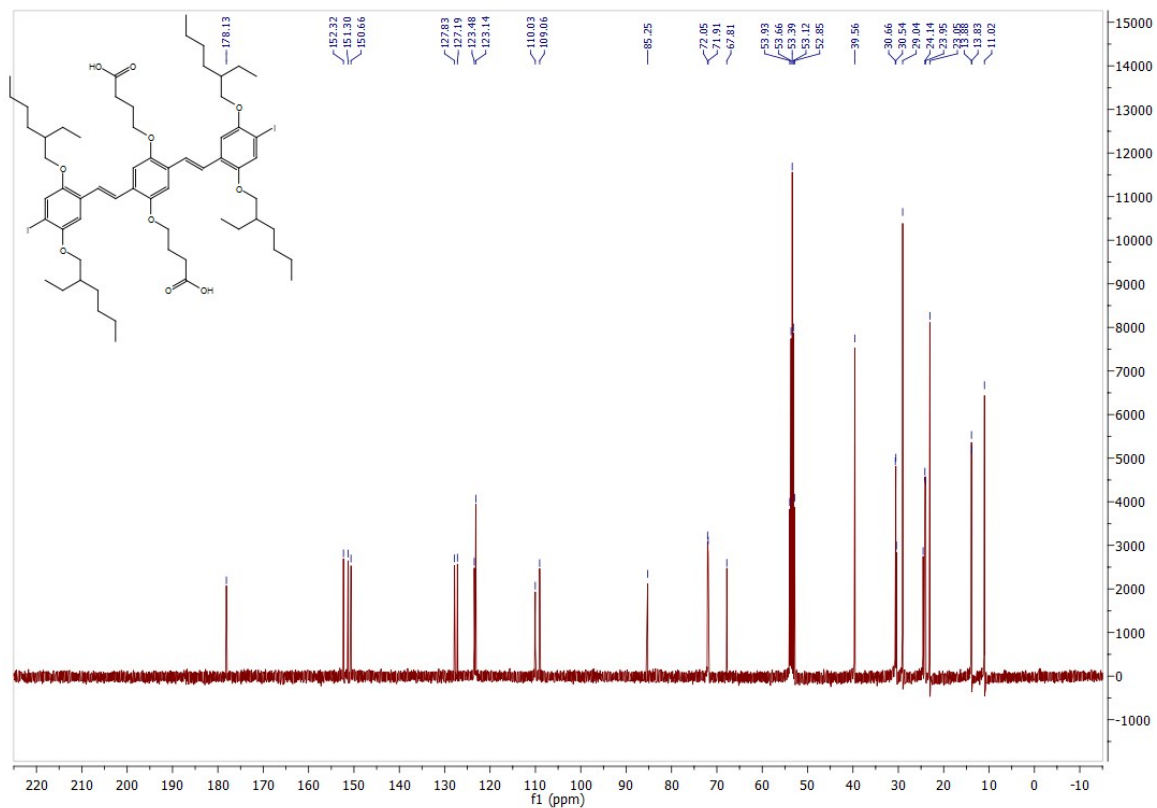

# Compound 7

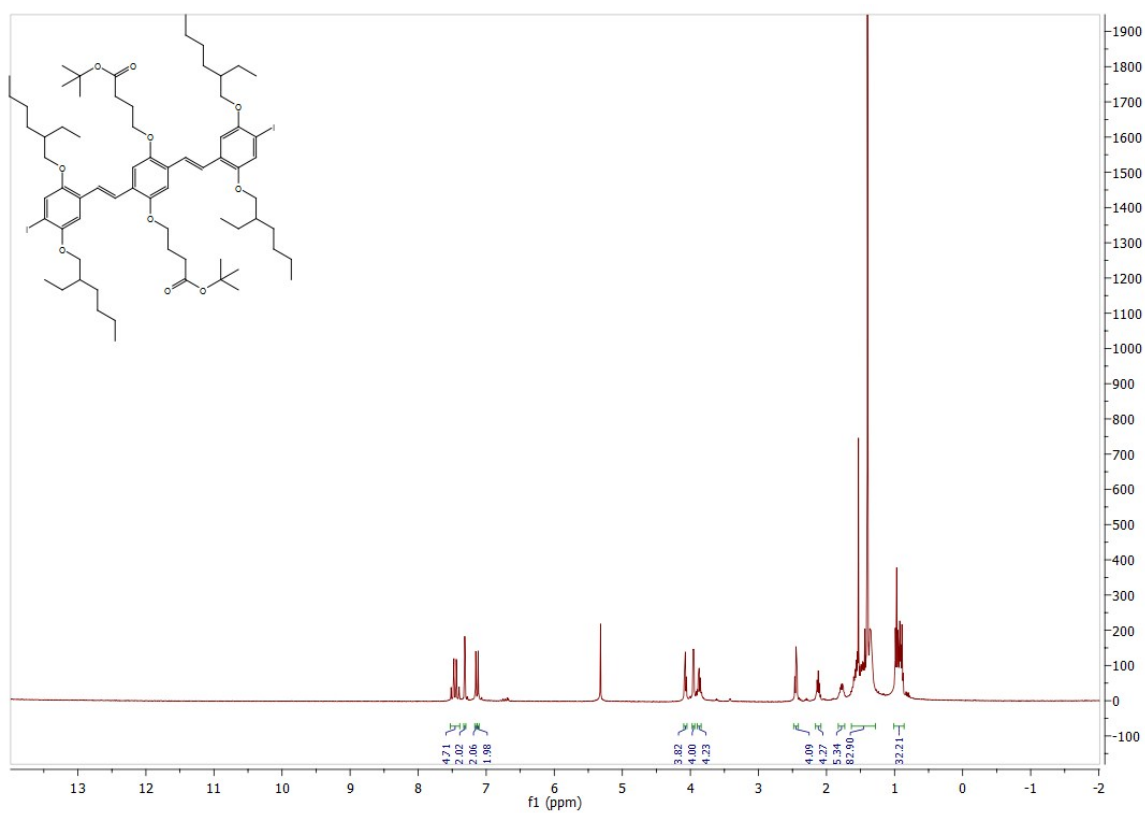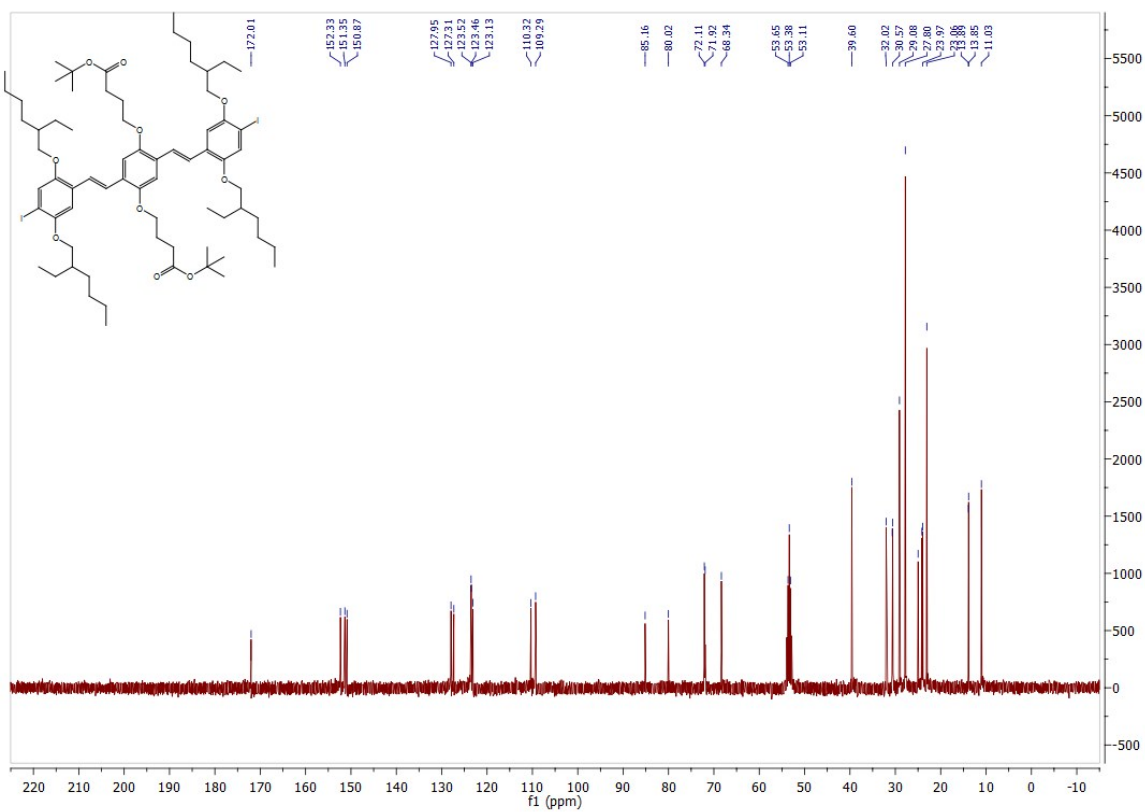

# Compound 8

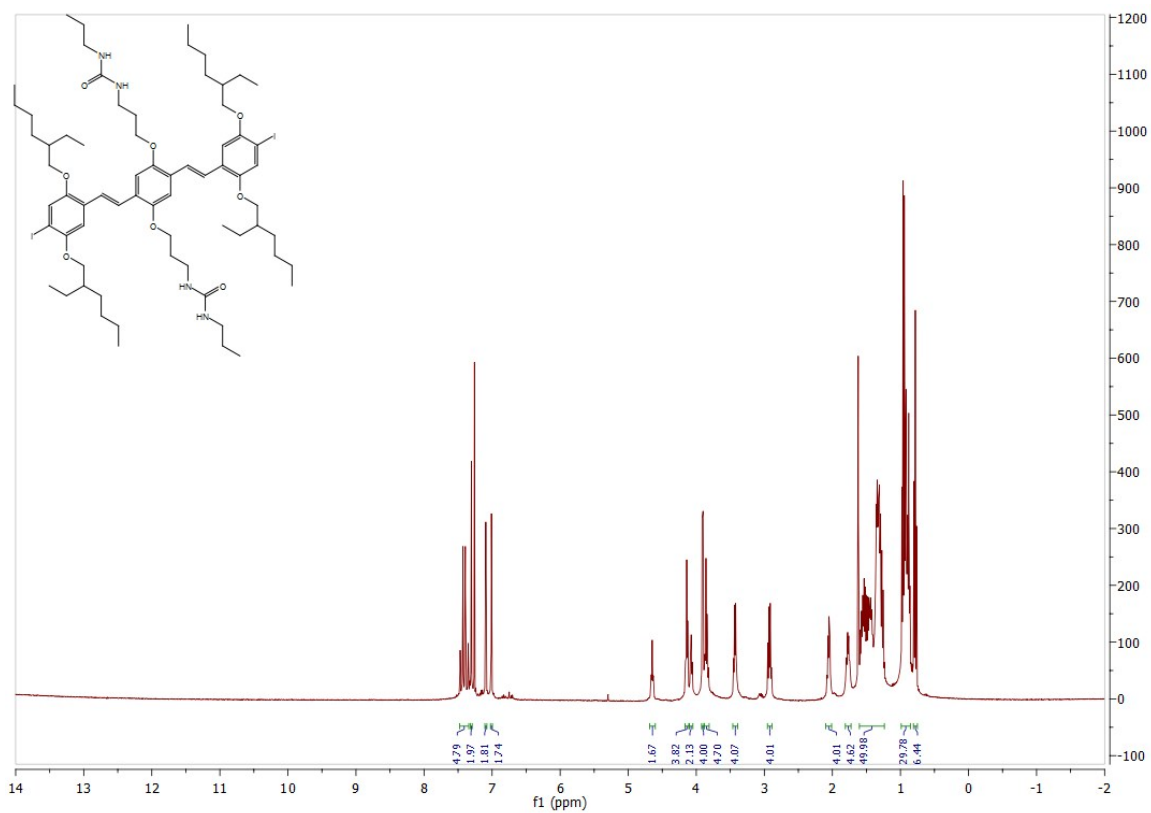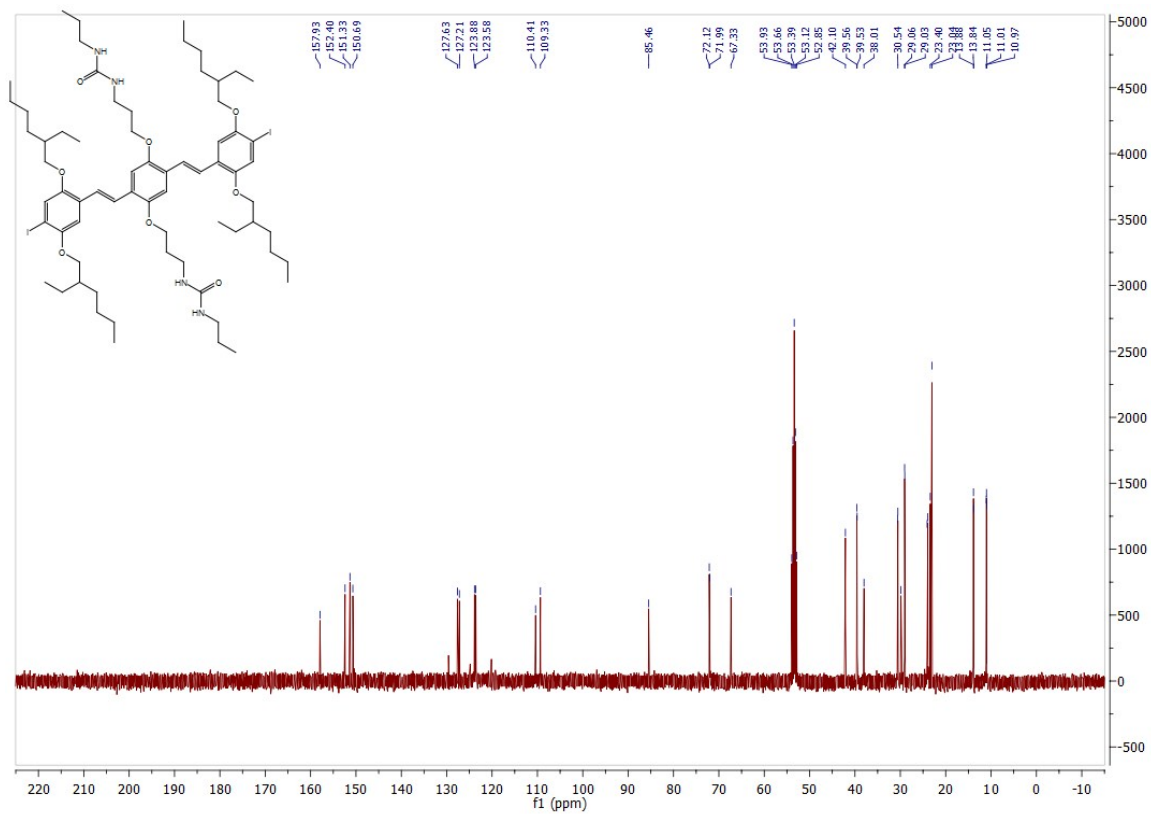

## Polymer 1

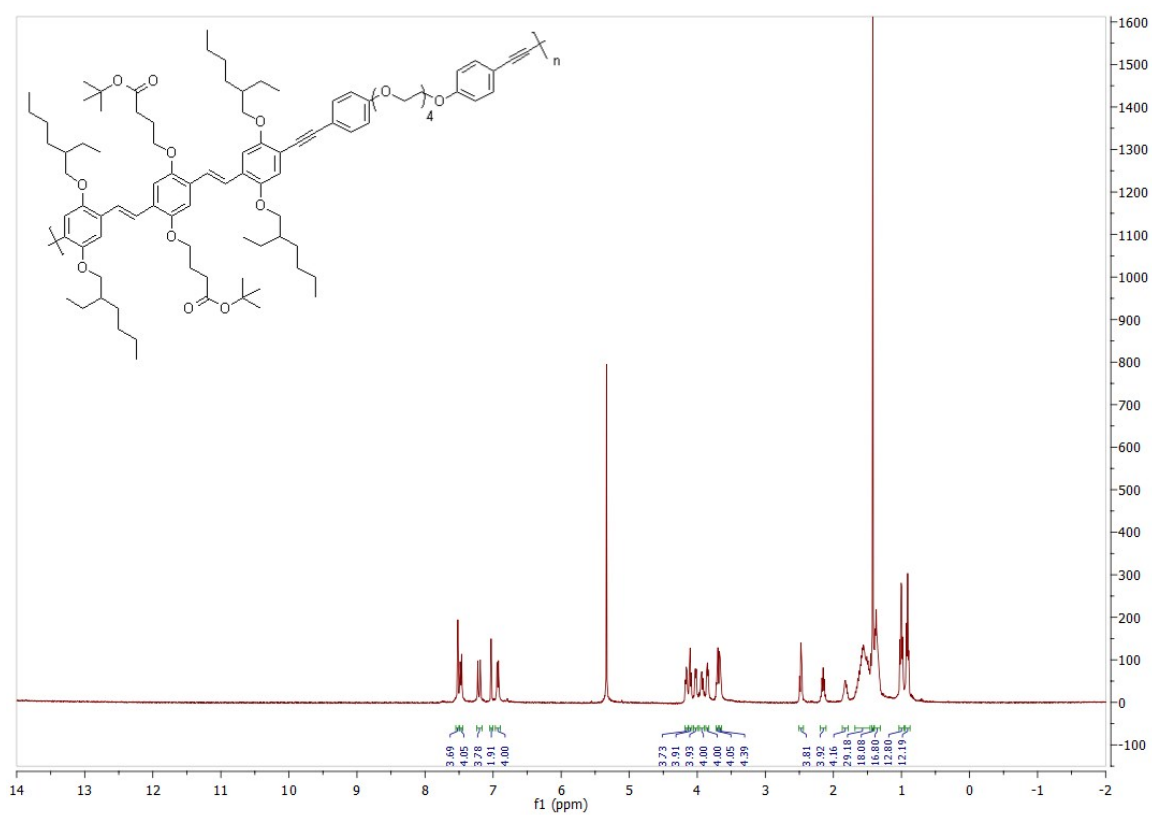

## Polymer 2

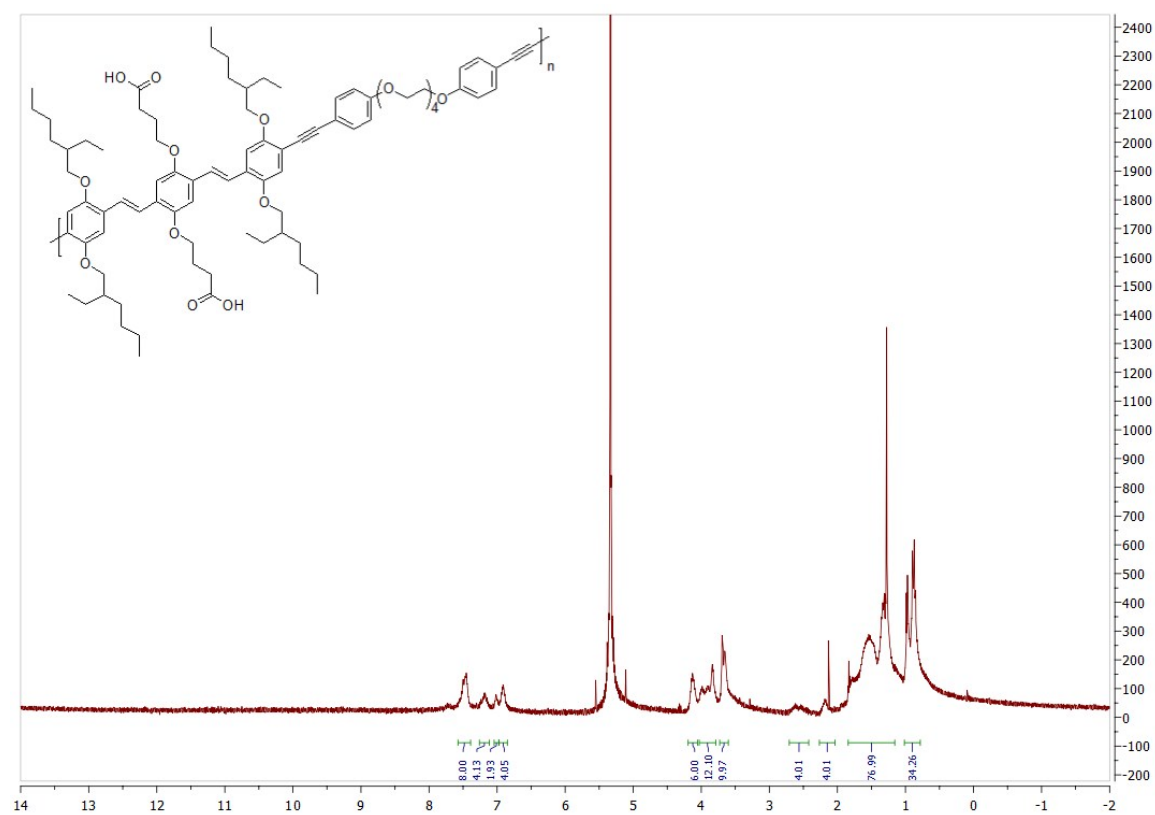

## Polymer 3

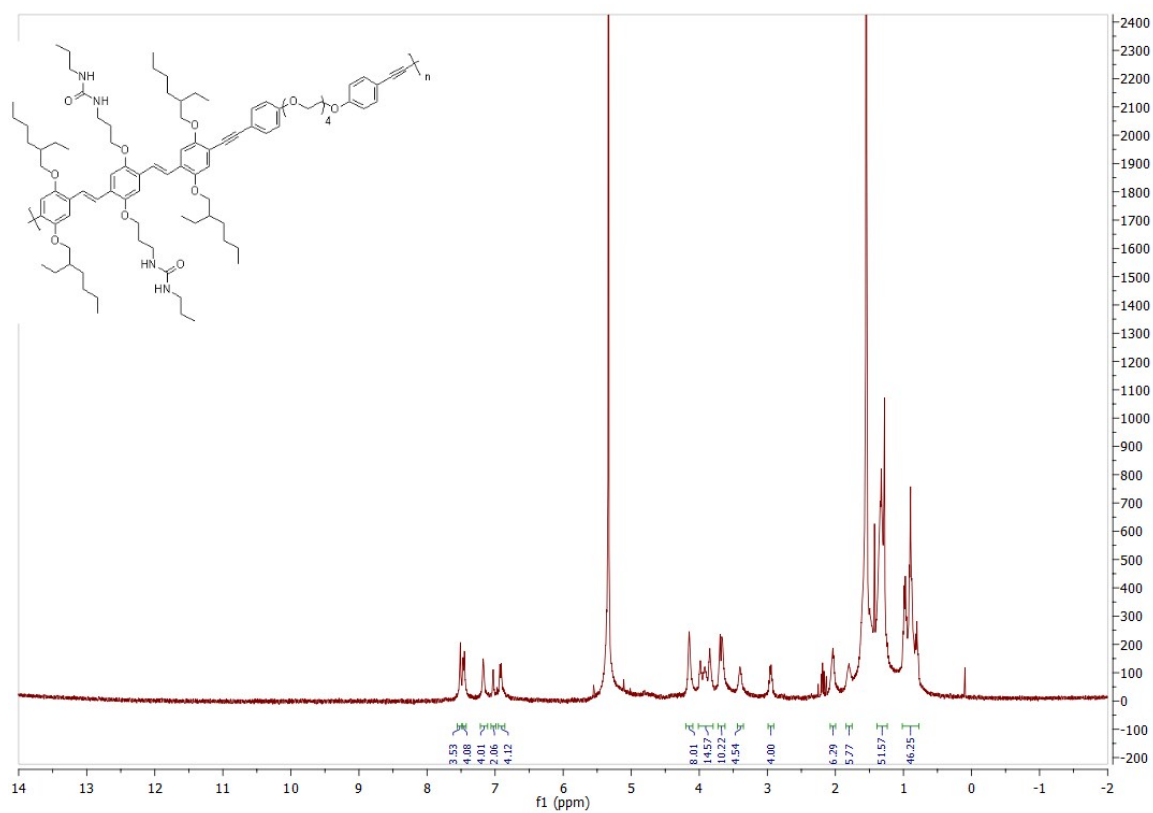

References:

- (1) Zhu, X.; Traub, M. C.; Vanden Bout, D. A.; Plunkett, K. N. Well-Defined Alternating Copolymers of Oligo(phenylenevinylene)s and Flexible Chains. *Macromolecules* **2012**, *45* (12), 5051–5057.
- (2) Pei, D.; Hong, J.; Lin, F.; Shi, Z.; Chen, Z.; Nie, H.; Guo, X. A Highly Sensitive and Selective Antioxidant Probe Based on a Bi-Modally Functionalized Conjugated Polyelectrolyte. *Chem. Commun.* **2011**, *47* (33), 9492–9494.
